# Supplementary material for: Purification, Identification, and Properties of a Novel Carotenoid Produced by Arthrobacter sp. QL17 Isolated from Mount Qomolangma
Source: MDPI journal article supplement (doi:10.3390/antiox11081493), 2022-07-29
Supplement: s1 [file s1]

Purification and characterization of a new carotenoid produced by *Arthrobacter antioxidans* QL17 isolated in Mount Qomolangma.

Xue Yu<sup>1,2,4</sup>, Kan Jiang<sup>5</sup>, Wei Zhang<sup>1,2\*</sup>, Shuqing Dong<sup>6</sup>, Yujie Wu<sup>2,3,4</sup>, Gaosen Zhang<sup>2,3</sup>, Shiyu Wu<sup>2</sup>, Tuo Chen<sup>2,3</sup>, & Guangxiu Liu<sup>1,2\*</sup>

\*Corresponding author: Wei Zhang\* & Guangxiu Liu\*

*E-mail address:* ziaoshen@163.com, Guangxiu Liu, liugx@lzb.ac.cn;

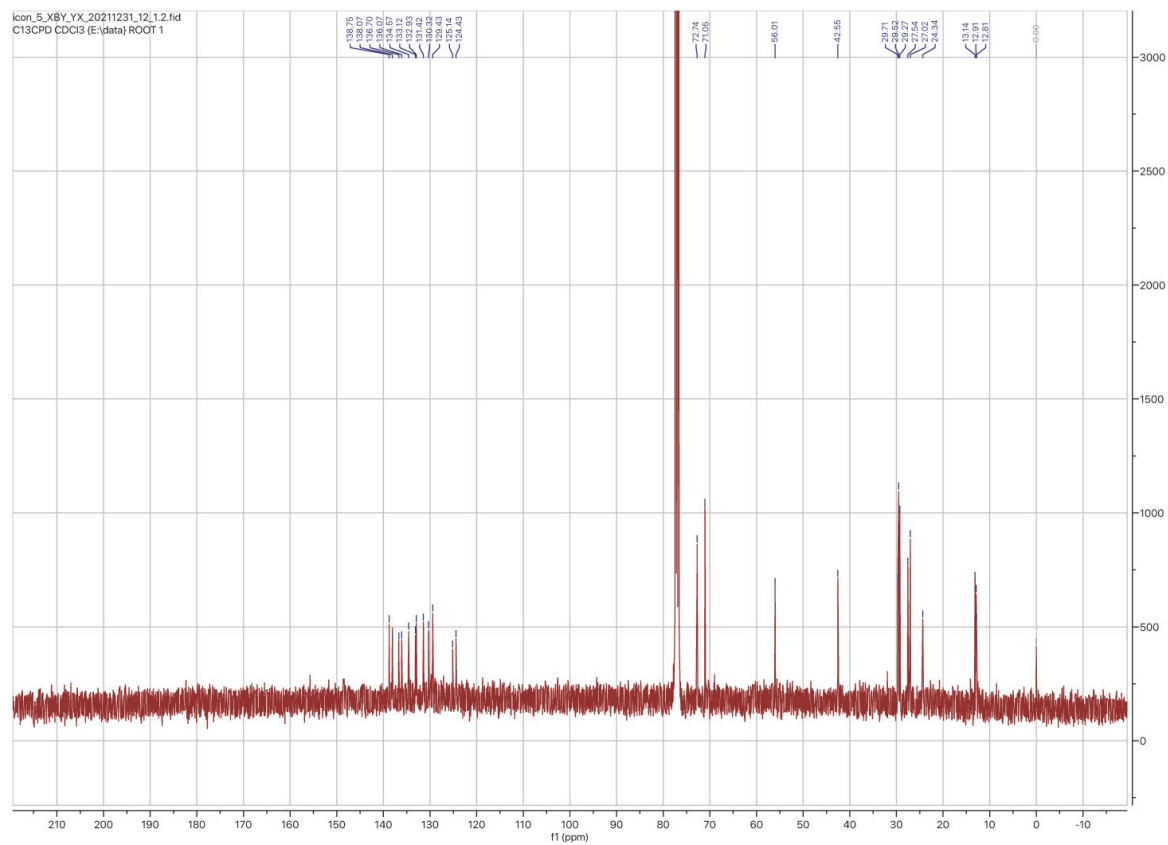

Figure S1.  $^{13}\text{C}$  NMR spectrum of arthroxanthin in  $\text{CDCl}_3$  (100 MHz).

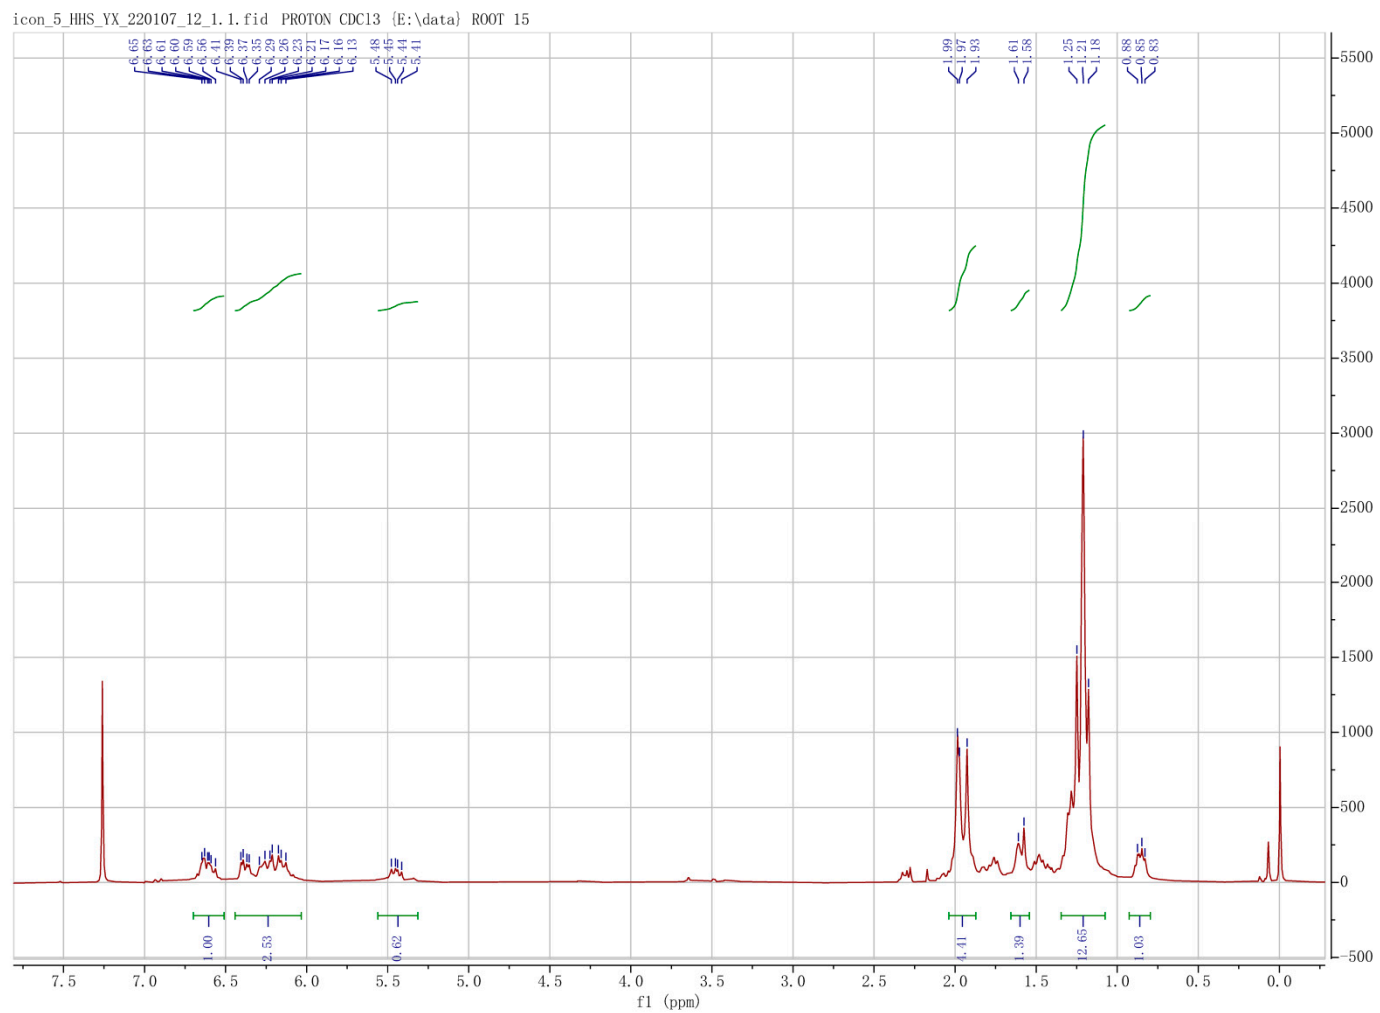

Figure S2.  $^1\text{H}$  NMR spectrum of arthroxanthin in  $\text{CDCl}_3$  (400 MHz).

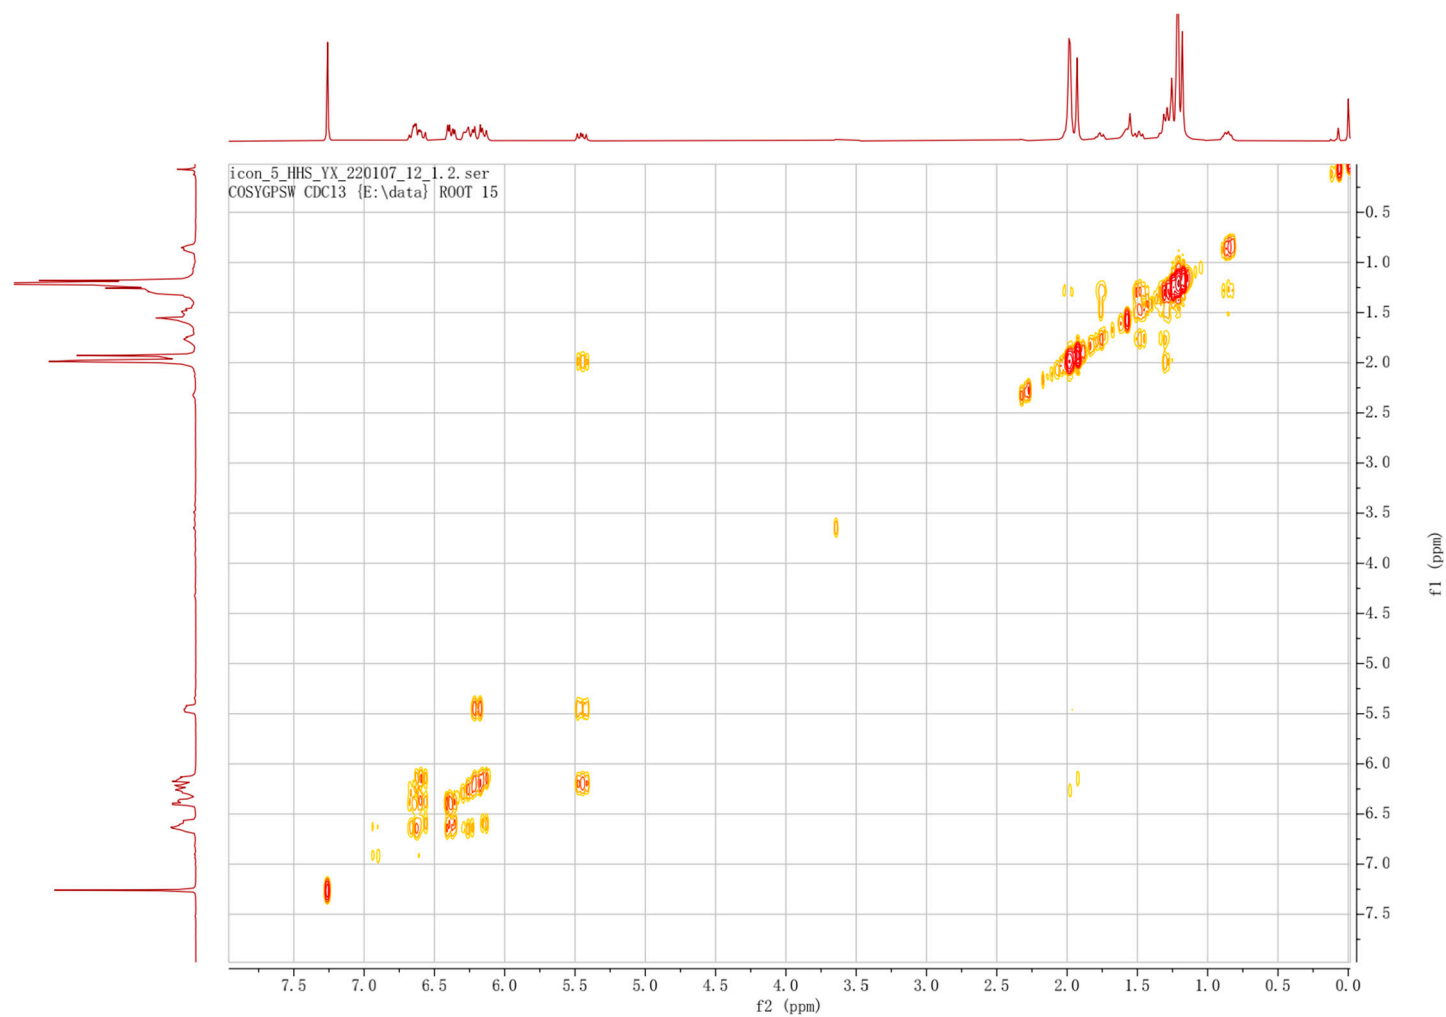

Figure S3.  $^1\text{H}$ - $^1\text{H}$ COSY spectrum of arthroanthin in  $\text{CDCl}_3$



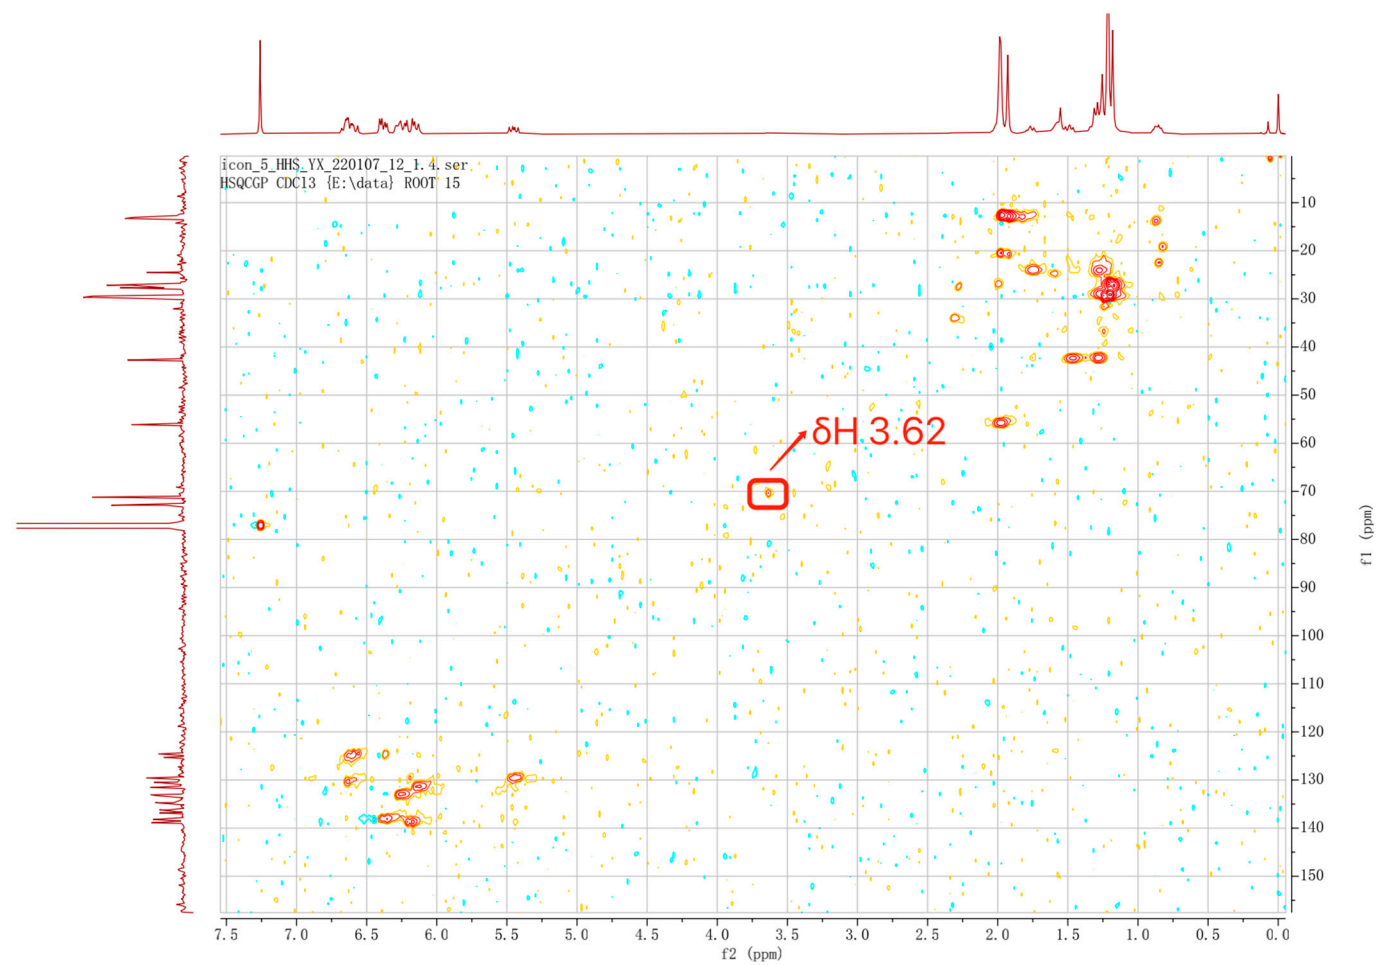

Figure S5. HSQC spectrum of arthroxanthin in CDCl<sub>3</sub>.
